# Supplementary material for: In Situ Incorporation of TiO2@Graphene Oxide (GO) Nanosheets in Polyacrylonitrile (PAN)-Based Membranes Matrix for Ultrafast Protein Separation
Source: MDPI journal article supplement (doi:10.3390/membranes13040377), 2023-03-26
Supplement: s1 [file s1]

# In Situ Incorporation of $\text{TiO}_2$ @Graphene Oxide (GO) Nanosheets in Polyacrylonitrile (PAN)-Based Membranes Matrix for Ultrafast Protein Separation

Wei Zhou <sup>1</sup>, Qiao Liu <sup>1,2,\*</sup>, Nong Xu <sup>2</sup>, Qing Wang <sup>2</sup>, Long Fan <sup>2</sup> and Qiang Dong <sup>1,2</sup>

<sup>1</sup> Hefei Tianmai Biotechnology Development Co., Ltd., No. 199 Fanhua Ave., Hefei 230601, China

<sup>2</sup> School of Energy, Materials and Chemical Engineering, Hefei University, Hefei 230601, China

\* Correspondence: liuqiao@hfuu.edu.cn

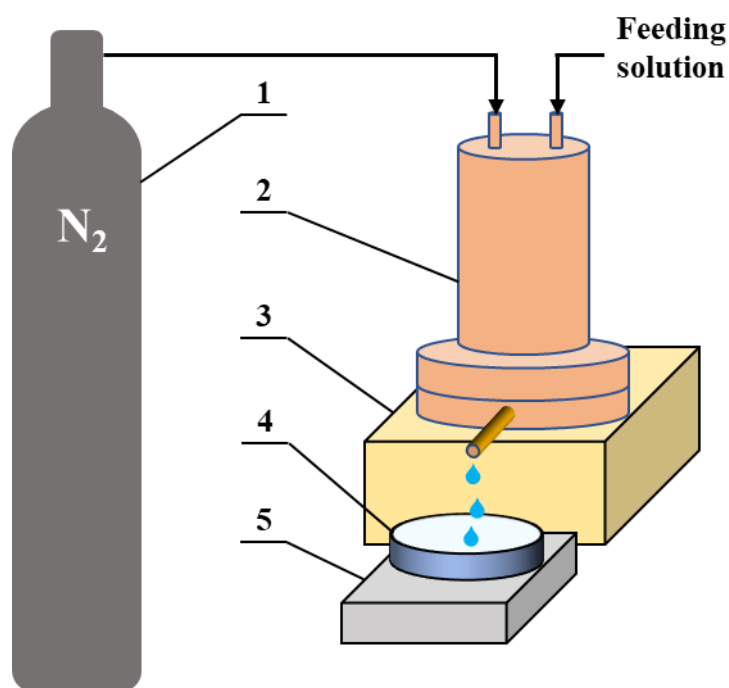

**Figure S1.** Schematic diagram of the homemade dead-end filtration equipment in filtration and anti-fouling tests. 1. Nitrogen cylinder, 2. Filtration cell, 3. Magnetic Stirrer, 4. Dish, 5. Balance.

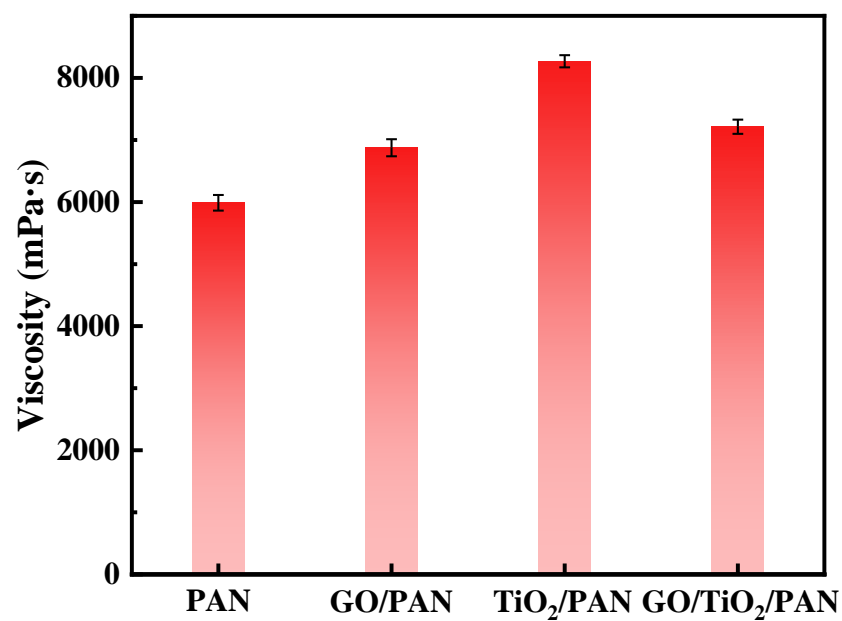

Figure S2. Casting solutions' viscosity of the PAN, GO/PAN, TiO<sub>2</sub>/PAN and GO/TiO<sub>2</sub>/PAN membranes.

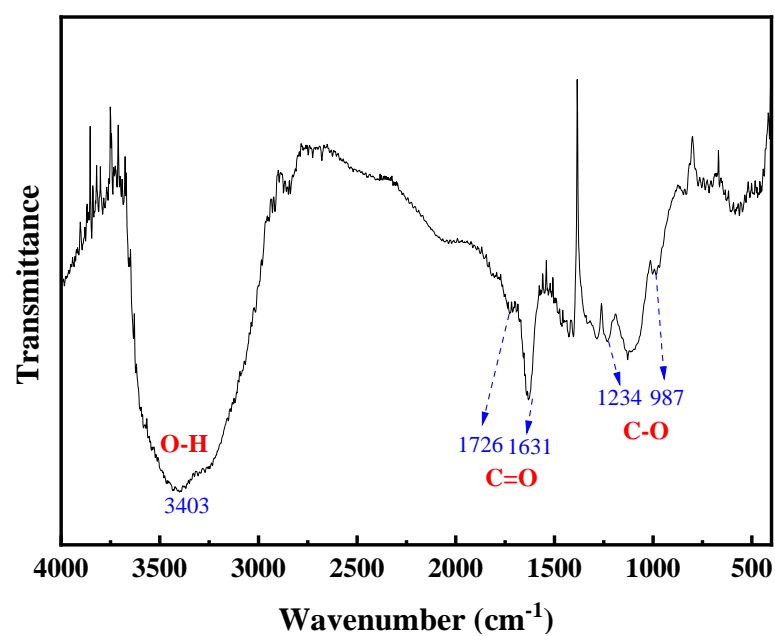

Figure S3. FTIR of the prepared GO nanosheets.

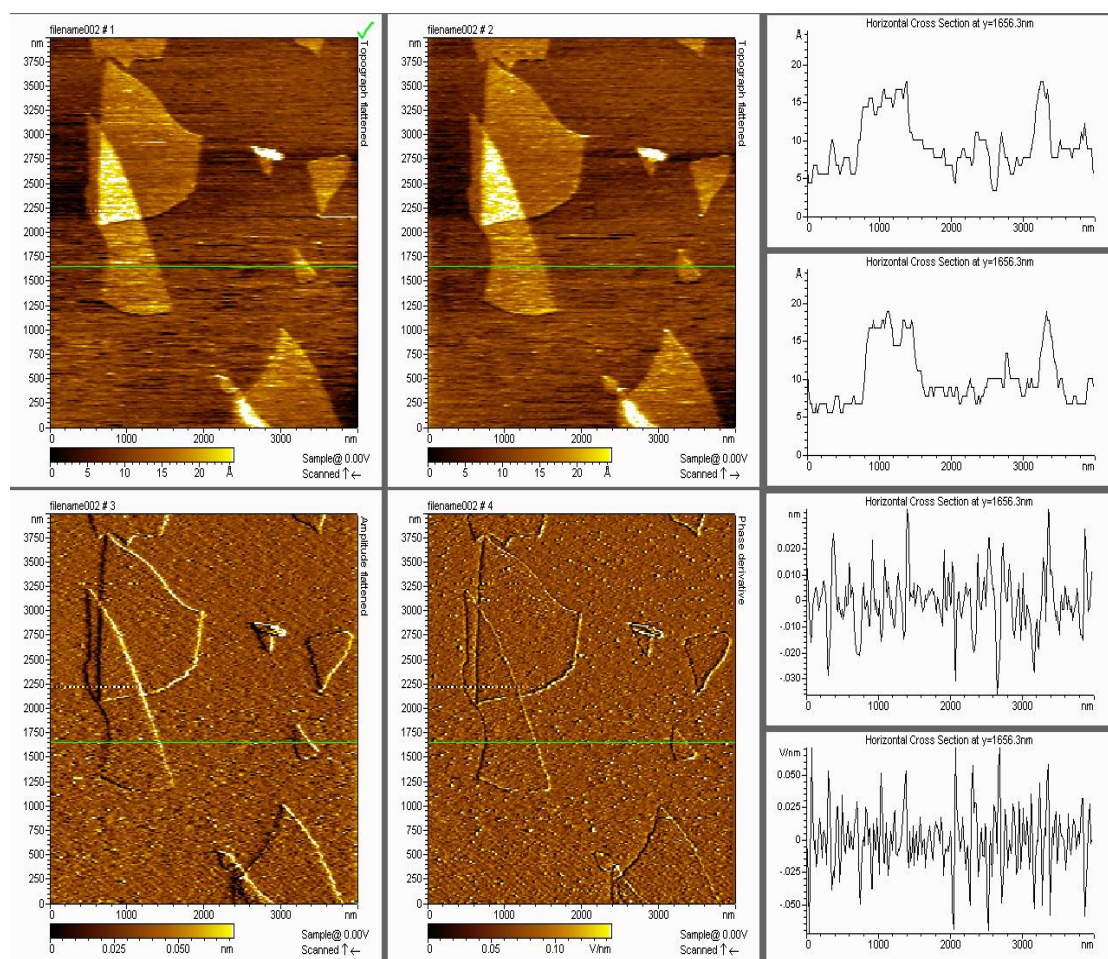

**Figure S4.** AFM images and curves of the horizontal cross sections of the prepared GO nanosheets.

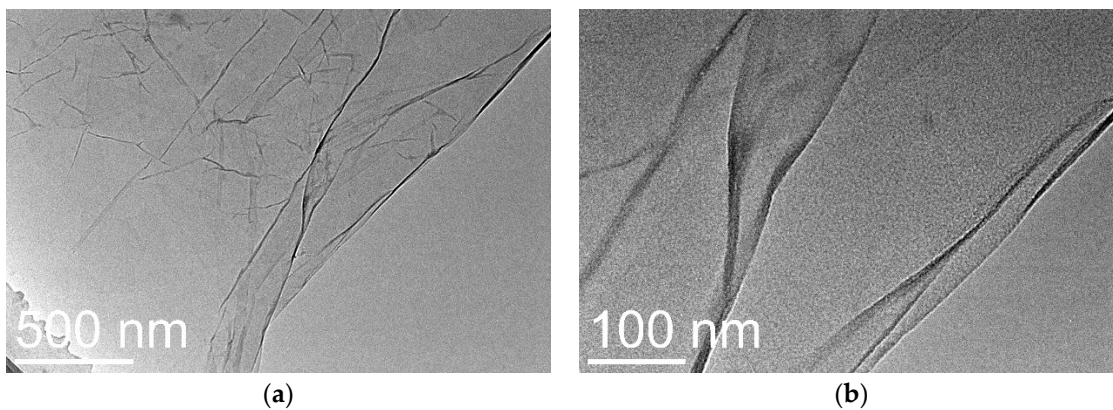

**Figure S5.** (a) and (b) TEM images of the prepared GO nanosheets.

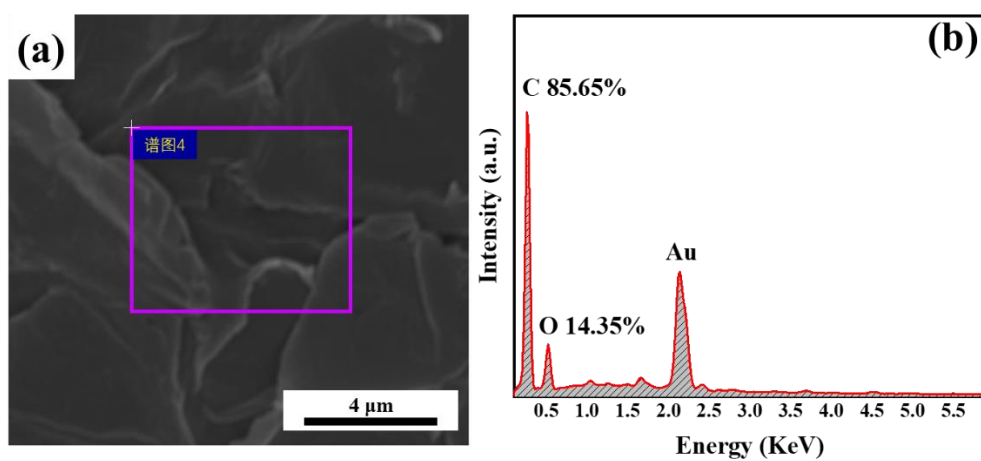

**Figure S6.** (a) FESEM images of the original GO nanosheets prepared by the modified Hummer's method. (b) corresponding EDX spectrum of the GO nanosheet's surface.

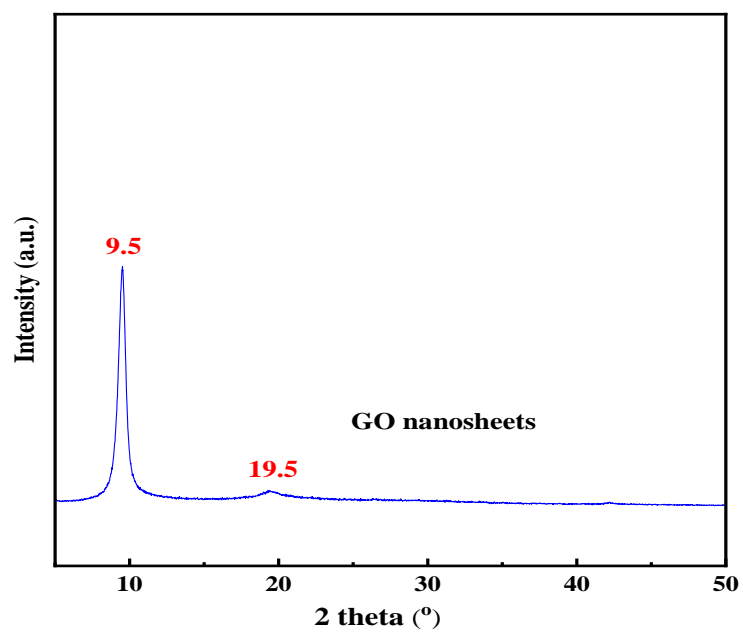

**Figure S7.** XRD curve of the prepared GO nanosheets.

**Table S1.** Comparison of the UF performance with others.

| Membrane                          | Symbol                                                                            | Pressure (MPa) | BSA Concentration (g·L <sup>-1</sup> ) | Water Flux (L·m <sup>-2</sup> ·h <sup>-1</sup> ) | BSA rejection (%) | Ref.      |
|-----------------------------------|-----------------------------------------------------------------------------------|----------------|----------------------------------------|--------------------------------------------------|-------------------|-----------|
| DPPA-GO/PSF                       |  | 0.1            | 0.2                                    | 245.1                                            | 95.8              | [1]       |
| QSiPD-rGO/PES                     |  | 0.1            | 0.5                                    | 270.0                                            | 98.0              | [2]       |
| 2% GO-7/PSF                       |  | 0.3            | 1.0                                    | 1056.6                                           | 88.7              | [3]       |
| K90/GO/PVDF                       |  | 0.2            | 0.5                                    | 1388.6                                           | 89.0              | [4]       |
| APTS-GO/PVP/PES                   |  | 0.4            | 1.0                                    | 248.0                                            | 99.5              | [5]       |
| PES/0.3GO/5T904                   |  | 0.1            | 1.0                                    | 245.0                                            | 93.3              | [6]       |
| Q-PSF/GO(0.5)                     |  | 0.2            | 0.5                                    | 686.2                                            | 98.0              | [7]       |
| 1-TiO <sub>2</sub> /PVDF          |  | 0.1            | 0.5                                    | 322.4                                            | 87.2              | [8]       |
| 25(SPPSu)/TiO <sub>2</sub>        |  | 0.2            | 0.1                                    | 60.0                                             | 93.0              | [9]       |
| PVDF/TiO <sub>2</sub>             |  | 0.1            | 1.0                                    | 156.2                                            | 35.2              | [10]      |
| PVDF/rGO/TiO <sub>2</sub> (70/30) |  | 0.3            | 0.5                                    | 219.5                                            | 99.3              | [11]      |
| 0.15wt% rGO/TiO <sub>2</sub> /PES |  | 0.5            | 0.5                                    | 50.5                                             | 98.5              | [12]      |
| 0.5%TNT/PVDF                      |  | 0.1            | 0.2                                    | 160.5                                            | 64.2              | [13]      |
| GO/TiO <sub>2</sub> /PAN          |  | 0.1            | 1.0                                    | 1487.6                                           | 99.5              | This work |

**Table S2.** Anti-fouling parameters of the PAN, GO/PAN, TiO<sub>2</sub>/PAN and GO/TiO<sub>2</sub>/PAN membranes in cyclic anti-fouling tests.

| Membranes                | First Cycle |                    |                     |                    | Second Cycle |                    |                     |                    |
|--------------------------|-------------|--------------------|---------------------|--------------------|--------------|--------------------|---------------------|--------------------|
|                          | FRR (%)     | R <sub>i</sub> (%) | R <sub>ir</sub> (%) | R <sub>t</sub> (%) | FRR (%)      | R <sub>i</sub> (%) | R <sub>ir</sub> (%) | R <sub>t</sub> (%) |
| PAN                      | 51.62       | 38.42              | 48.38               | 86.80              | 71.37        | 52.42              | 28.63               | 81.05              |
| GO/PAN                   | 59.67       | 41.75              | 43.61               | 85.36              | 78.23        | 53.42              | 25.38               | 78.80              |
| TiO <sub>2</sub> /PAN    | 62.89       | 45.04              | 37.11               | 82.15              | 81.68        | 57.86              | 18.30               | 76.16              |
| GO/TiO <sub>2</sub> /PAN | 68.43       | 47.89              | 31.57               | 79.46              | 87.74        | 58.21              | 12.26               | 70.47              |

## References

- Xu, Z.; Ye, X.; Hu, P.; Min, Y. A.; A, B. L.; Qin, M. B.; A, G. C.; Azido-group functionalized graphene oxide/polysulfone mixed matrix ultrafiltration membrane with enhanced interfacial compatibility for efficient water and wastewater treatment. *Sep. Purif. Technol.* **2022**, 283, 120162.
- Ismail, R. A.; Kumar, M.; Thomas, N.; An, A. K.; Arafat, H. A.; Multifunctional hybrid UF membrane from poly (ether sulfone) and quaternized polydopamine anchored reduced graphene oxide nanohybrid for water treatment. *J. Membrane Sci.* **2021**, 639, 119779.
- Zambare, R. S.; Dhopte, K. B.; Nemade, P. R.; Tang, C. Y.; Effect of oxidation degree of GO nanosheets on microstructure and performance of polysulfone-GO mixed matrix membranes. *Sep. Purif. Technol.* **2020**, 244, 116865.
- Ma, H.; Xie, Q.; Wu, C.; A facile approach to enhance performance of PVDF-matrix nanocomposite membrane via manipulating migration behavior of graphene oxide. *J. Membrane Sci.* **2019**, 590, 117268.
- Luque-Alled, J. M.; Abdel-Karim, A.; Alberto, M.; Leaper, S.; Gorgojo, P.; Polyethersulfone membranes: From ultrafiltration to nanofiltration via the incorporation of APTS functionalized-graphene oxide. *Sep. Purif. Technol.* **2020**, 230, 115836.
- Abdel-Karim, A.; Leaper, S.; Alberto, M.; Vijayarhavan, A.; Fan, X.; Holmes, S. M.; Souaya, E. R.; Badawy, M.I.; Gorgojo, P.; High flux and fouling resistant flat sheet polyethersulfone membranes incorporated with graphene oxide for ultrafiltration applications. *Chem. Eng. J.* **2018**, 334, 789–799.
- Wang, H.; Wang, W.; Wang, L.; Zhao, B.; Zhang, Z. X.; Enhancement of hydrophilicity and the resistance for irreversible fouling of polysulfone (PSF) membrane immobilized with graphene oxide (GO) through chloromethylated and quaternized reaction. *Chem. Eng. J.* **2018**, 334, 2068–2078.
- Farahani, M. H. D. A.; Vatanpour, V.; A comprehensive study on the performance and antifouling enhancement of the PVDF mixed matrix membranes by embedding different nanoparticulates: clay, functionalized carbon nanotube, SiO<sub>2</sub> and TiO<sub>2</sub>. *Sep. Purif. Technol.* **2018**, 197, 372–381.

9. Arockiasamy, D. L.; Alhoshan, M.; Alam, J.; Muthumareeswaran.; Figoil, A.; Kumar, A.; Separation of proteins and antifouling properties of polyphenylsulfone based mixed matrix hollow fiber membranes. *Sep. Purif. Technol.* **2017**, *174*, 529–543.
10. Zhang, J.; Wang, Z.; Wang, Q.; Pan, C.; Wu, Z.; Comparison of antifouling behaviours of modified PVDF membranes by TiO<sub>2</sub> sols with different nanoparticle size: Implications of casting solution stability. *J. Membrane Sci.* **2017**, *525*, 378–386.
11. Safarpour, M.; Khataee, A.; Vatanpour, V.; Effect of reduced graphene oxide/TiO<sub>2</sub> nanocomposite with different molar ratios on the performance of PVDF ultrafiltration membranes. *Sep. Purif. Technol.* **2015**, *140*, 32–42.
12. Padaki, M.; Emadzadeh, D.; Masturra, T.; Ismail, A. F.; Antifouling properties of novel PSf and TNT composite membrane and study of effect of the flow direction on membrane washing. *Desalination* **2015**, *362*, 141–150.
13. Subramaniam, M. N.; Goh, P. S.; Lau, W. J.; Tan, Y. H.; Ng, B. C.; Ismail, A. F. Hydrophilic hollow fiber PVDF ultrafiltration membrane incorporated with titanate nanotubes for decolourization of aerobically-treated palm oil mill effluent. *Chem. Eng. J.* **2017**, *316*, 101–110.
